# Supplementary material for: Monitoring the elimination of human African trypanosomiasis: Update to 2014
Source: PLoS Negl Trop Dis. 2017 May 22;11(5):e0005585. doi: 10.1371/journal.pntd.0005585 (PMC5456402; doi:10.1371/journal.pntd.0005585)
Supplement: S1 Text — Fig A Geographic distribution of fixed health facilities having capacities for clinical diagnosis of gambiense and rhodesiense HAT (i) and serological diagnosis of gambiense HAT (ii) Fig B Geographic distribution of fixed health facilities having capacities for parasitological diagnosis of HAT (i) and stage determination (ii) Fig C Geographic distribution of fixed health facilities having capacities for treatment of gambiense HAT first-stage infections with pentamidine and of rhodesiense HAT first-stage infections with suramin (i) and second-stage infection with melarsoprol (ii) Fig D Geographic distribution of fixed health facilities having capacities for treatment of gambiense HAT second-stage infections with eflornithine (i) and with nifurtimox-eflornithine combination therapy (ii). (DOCX) [file pntd.0005585.s001.docx]

**Additional file**

**Geographic distribution of fixed health facilities having capacities for diagnosis of human African trypanosomiasis**
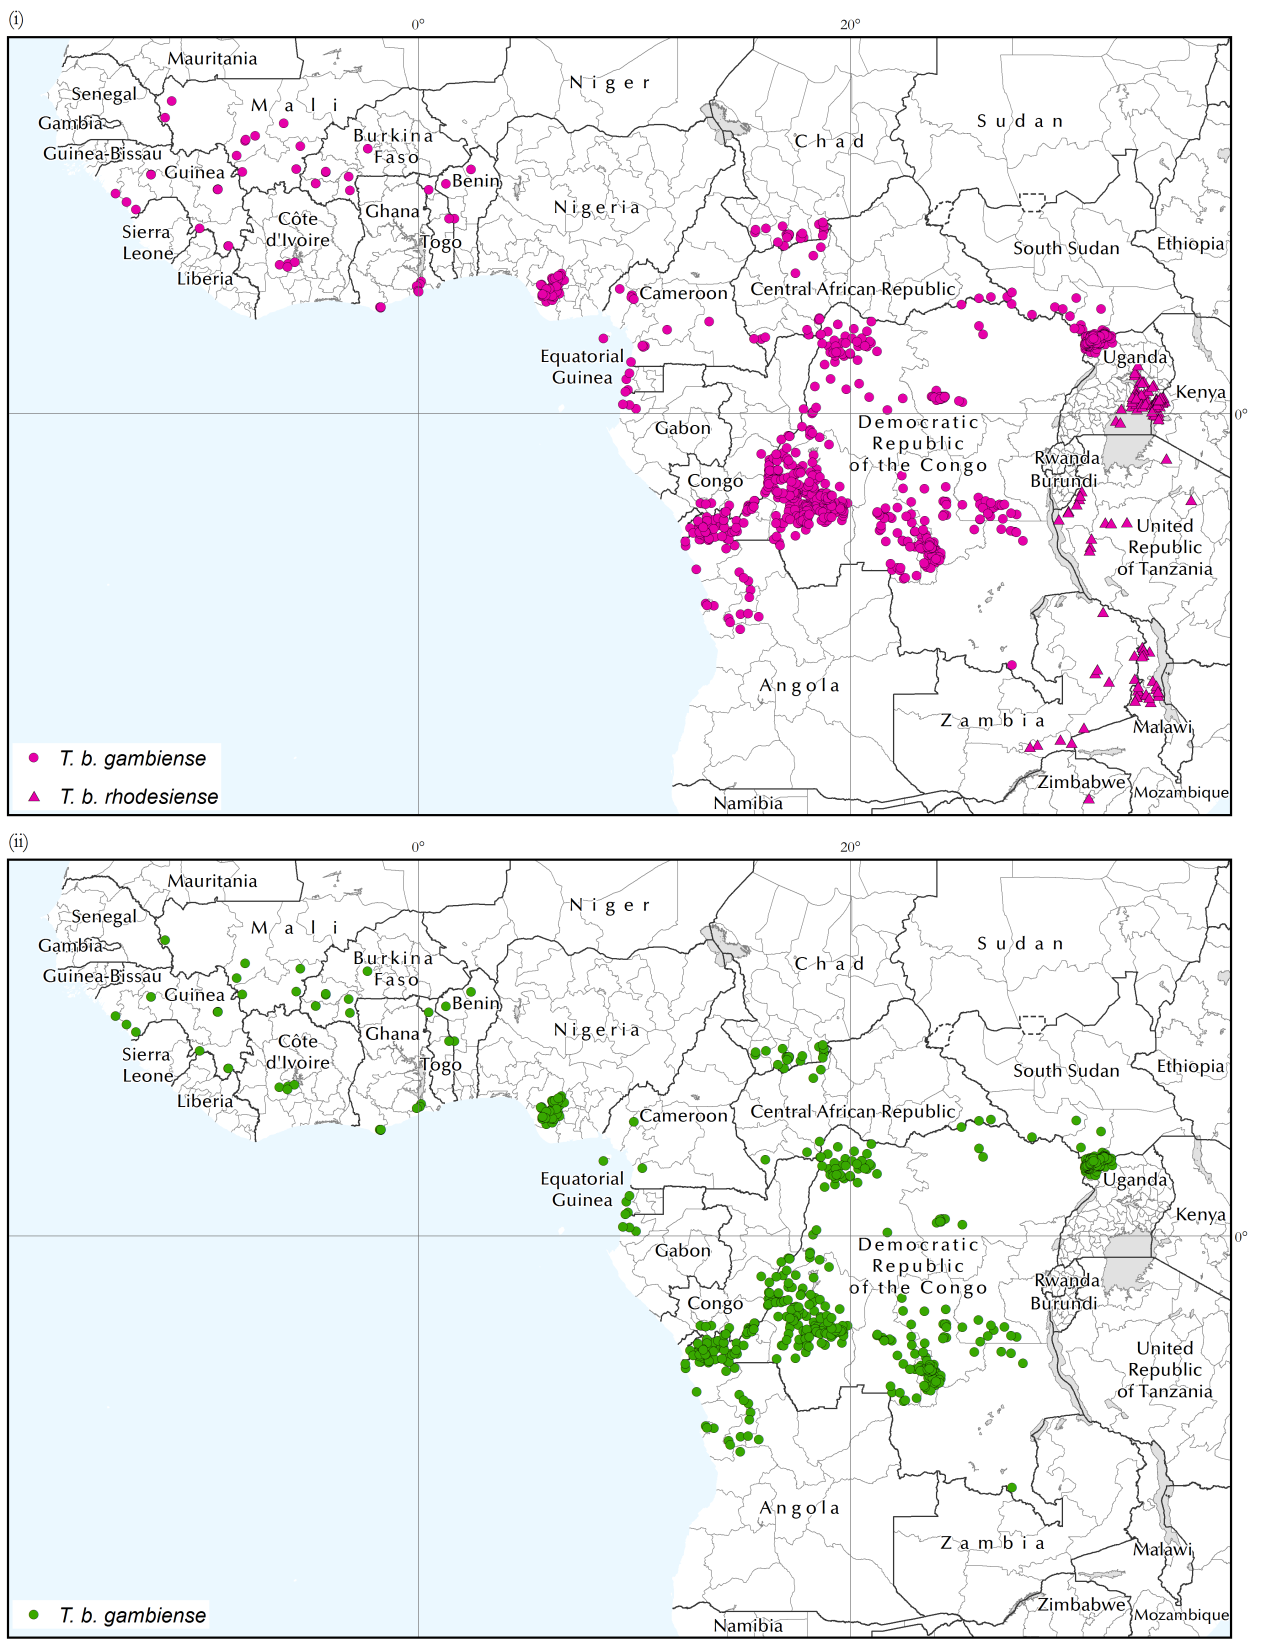


Fig Geographic distribution of fixed health facilities having capacities for clinical diagnosis of gambiense and rhodesiense HAT (i) and serological diagnosis of gambiense HAT (ii)


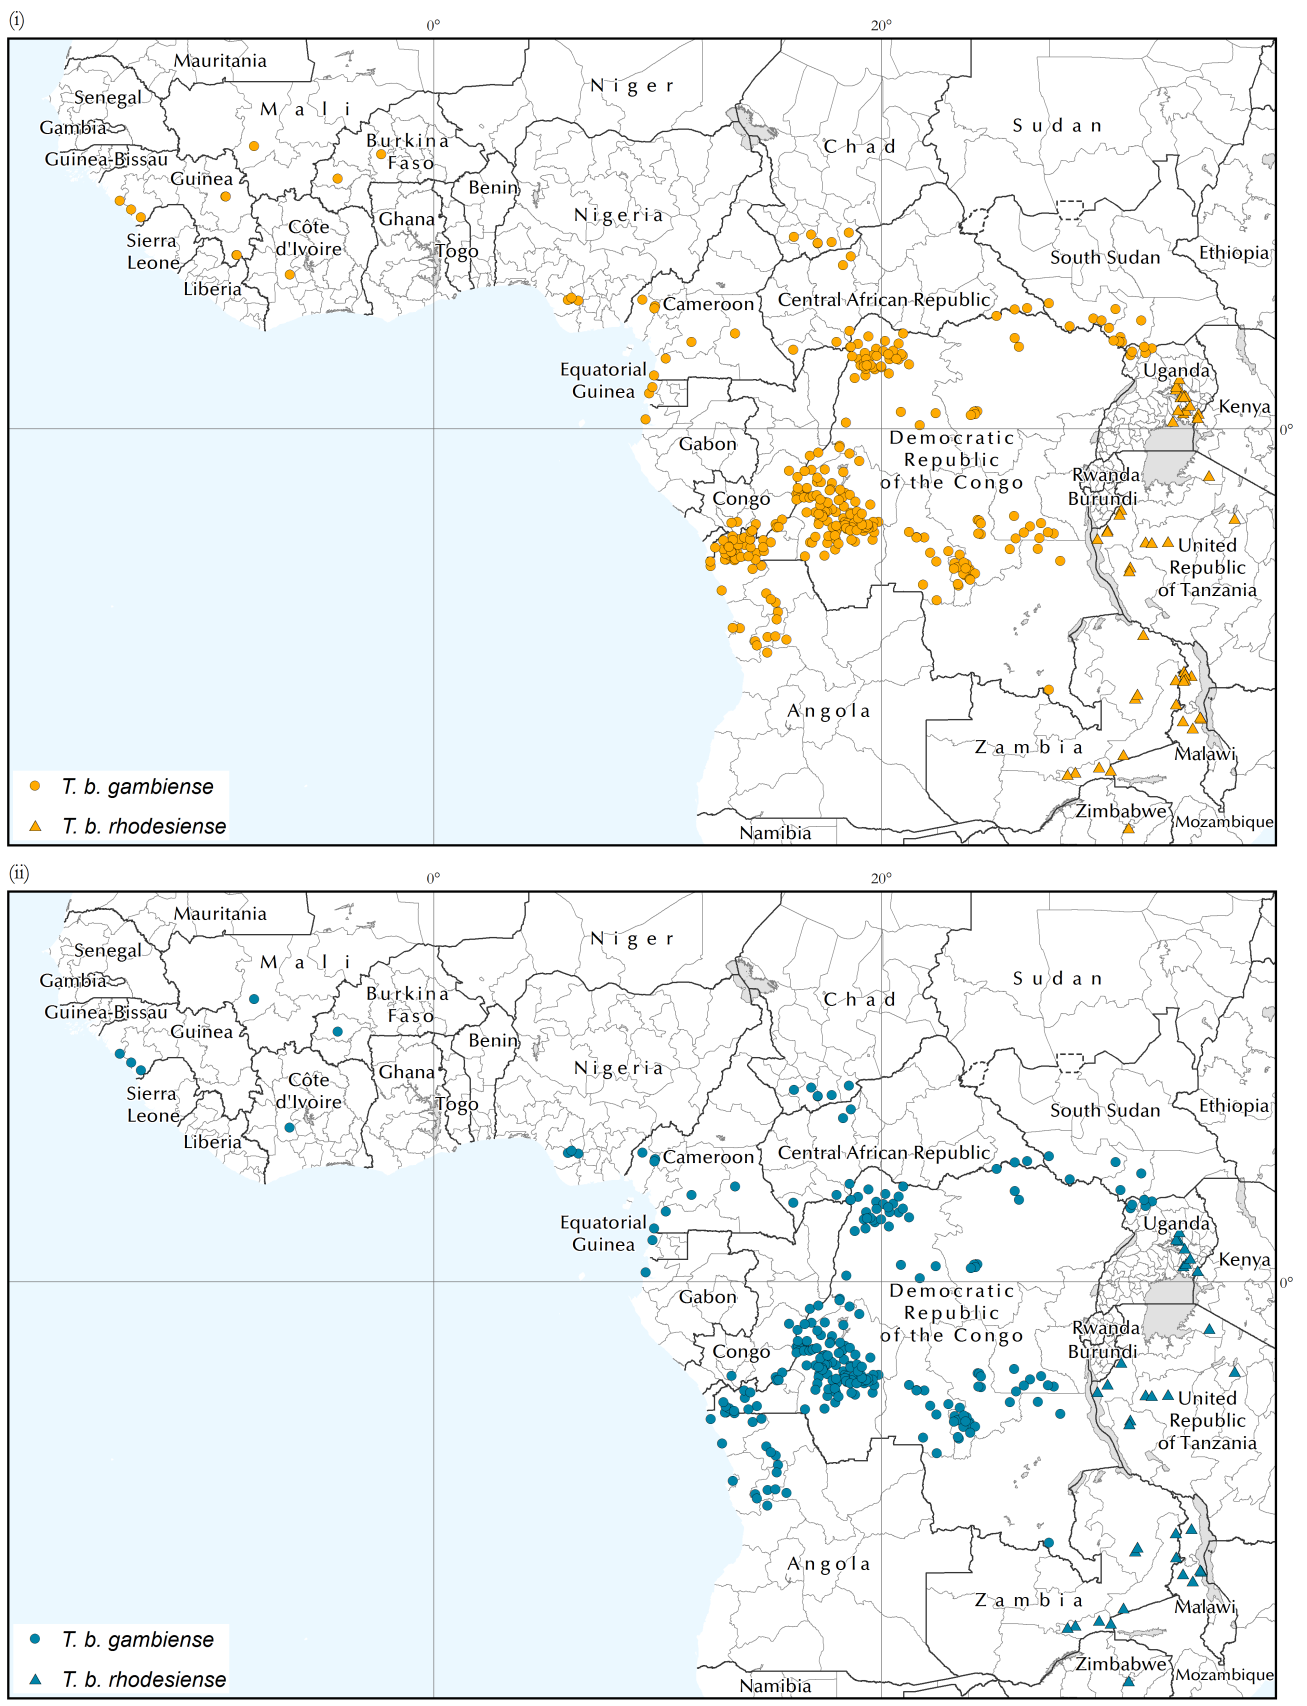


Fig Geographic distribution of fixed health facilities having capacities for parasitological diagnosis of HAT (i) and stage determination (ii)

**Geographic distribution of fixed health facilities having capacities for treatment of human African trypanosomiasis**
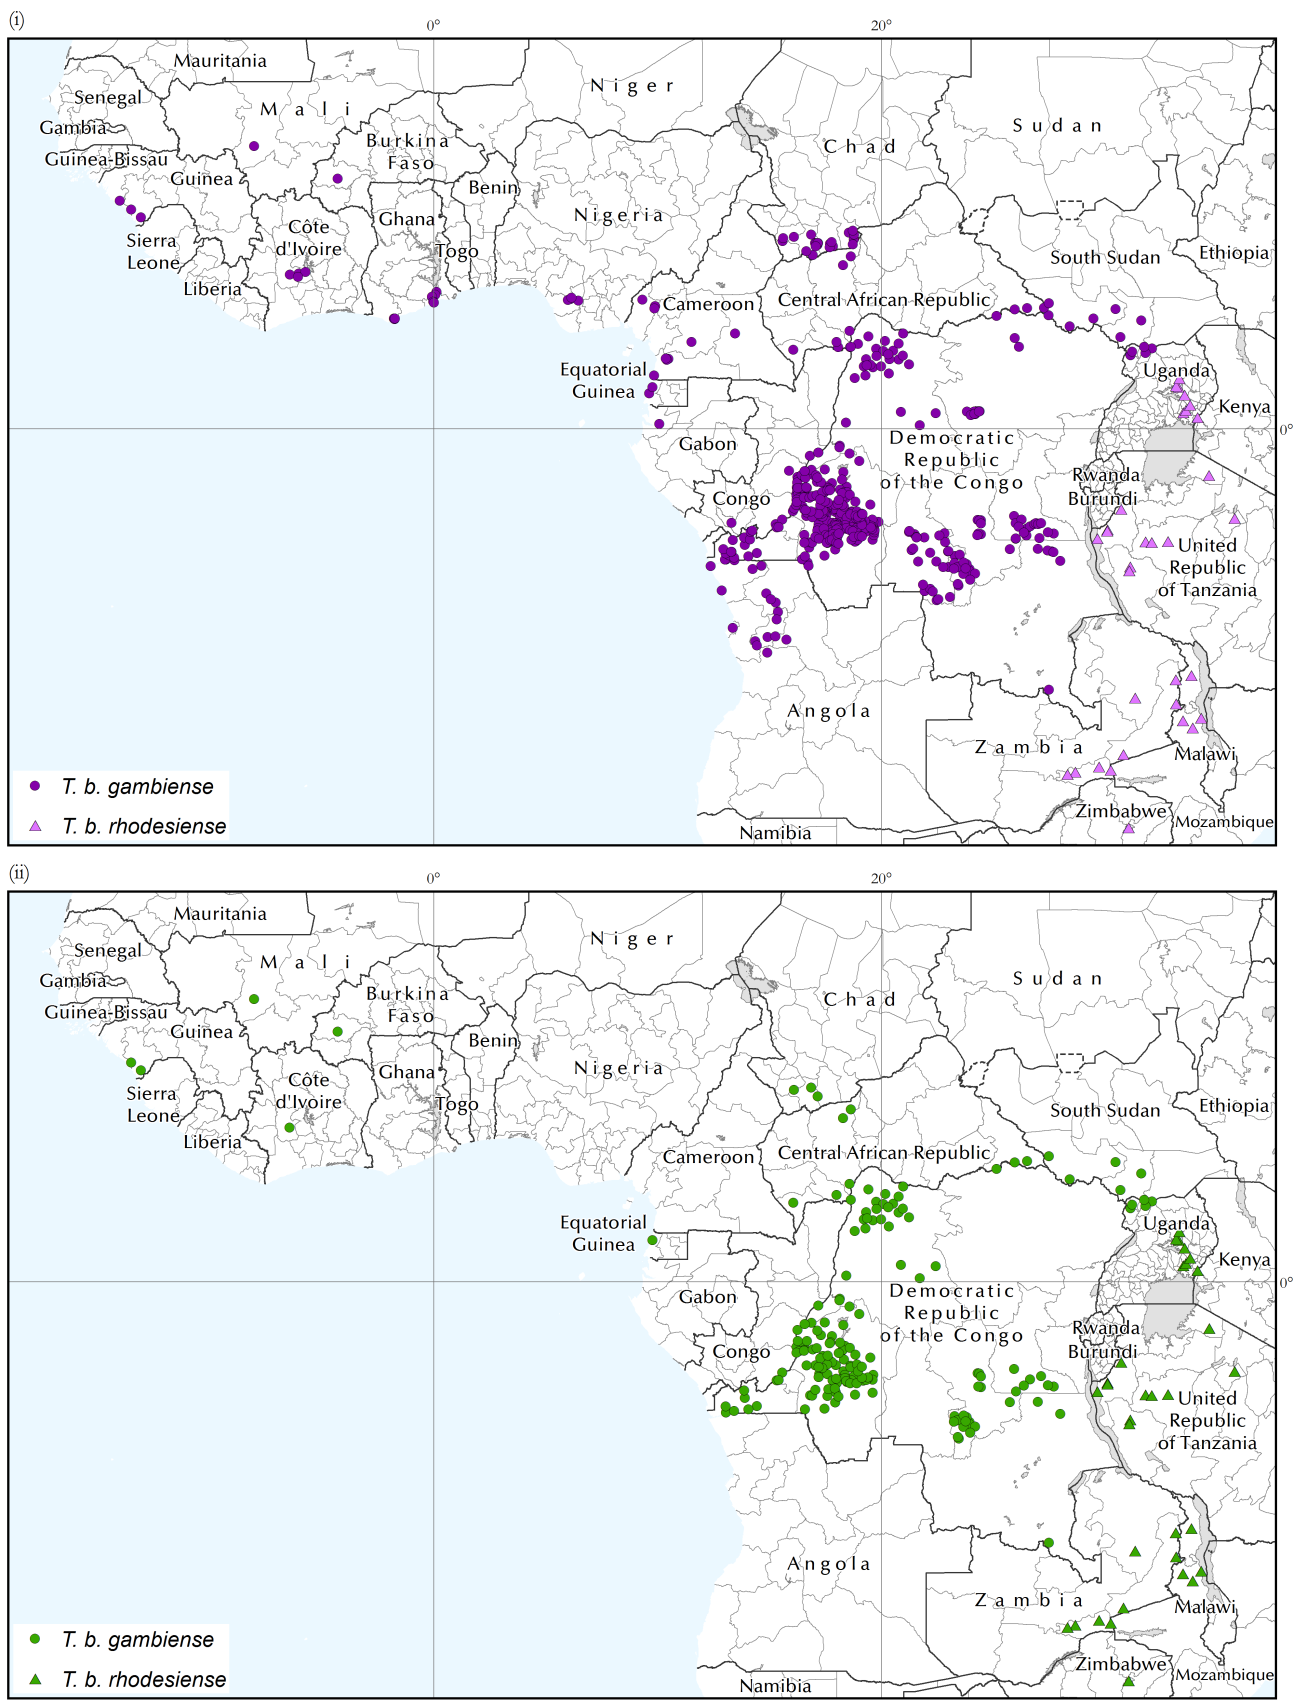


Fig Geographic distribution of fixed health facilities having capacities for treatment of gambiense HAT first-stage infections with pentamidine and of rhodesiense HAT first-stage infections with suramin (i) and second-stage infection with melarsoprol (ii)


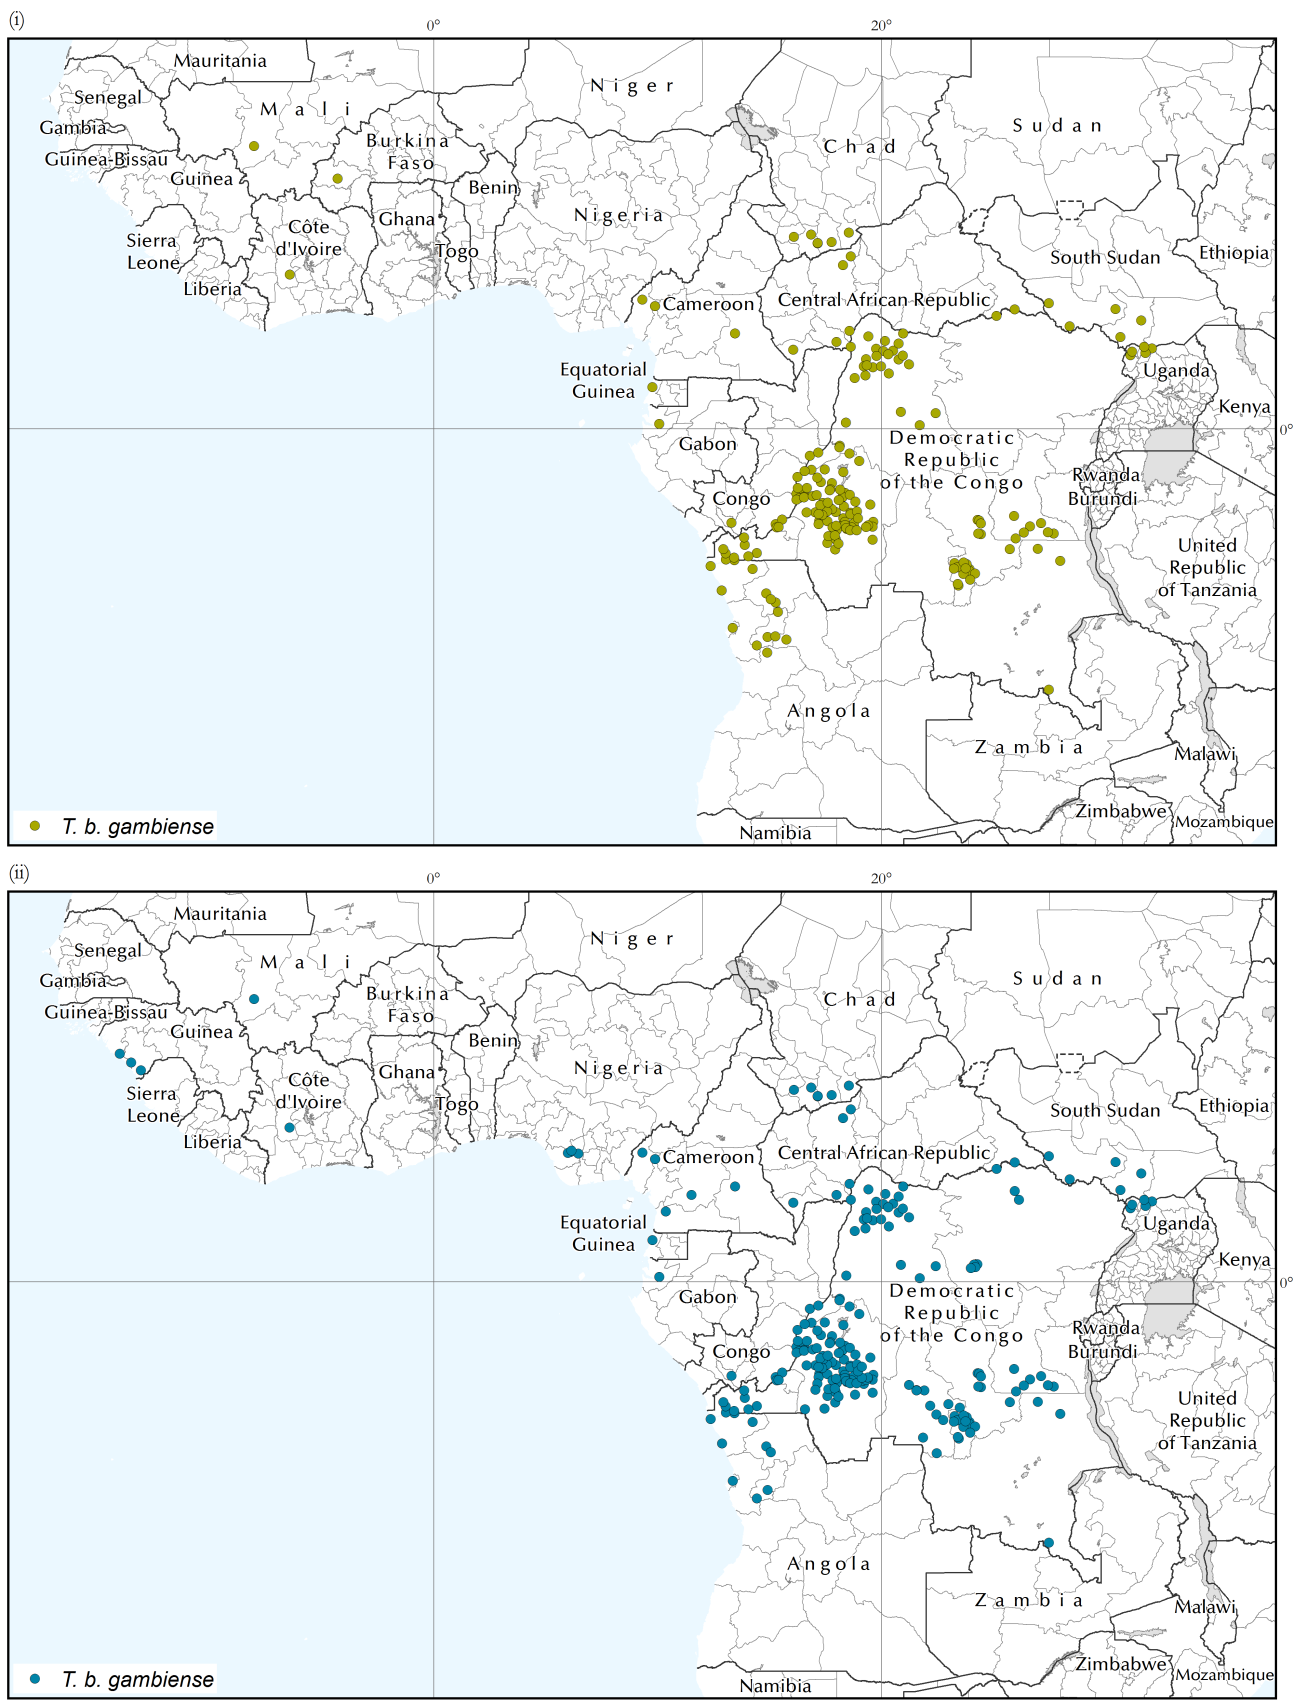


Fig Geographic distribution of fixed health facilities having capacities for treatment of gambiense HAT second-stage infections with eflornithine (i) and with nifurtimox-eflornithine combination therapy (ii)
